# Supplementary material
Source: PubMed Central journal article supplement (PMC2950319)
Supplement: NIHMS140315-supplement-1.pdf [file NIHMS140315-supplement-1.pdf]

Table 1: Cancer-related biomarkers of tobacco smoke [Adapted from Hatsukami, 2006]

| Biomarker                                                             | Measurement                                                   | <i>Relation to Tobacco use:</i>                                                                                                     |                                                            |                                                              |                                      |
|-----------------------------------------------------------------------|---------------------------------------------------------------|-------------------------------------------------------------------------------------------------------------------------------------|------------------------------------------------------------|--------------------------------------------------------------|--------------------------------------|
|                                                                       |                                                               | Difference: Users vs. Non-users                                                                                                     | Change with Cessation                                      | Dose Response with Use                                       | Change with Reduced Use              |
| <i>1. Chemical Biomarkers</i>                                         |                                                               |                                                                                                                                     |                                                            |                                                              |                                      |
| NNAL and NNAL-Glucs in urine                                          | Carcinogen (NNK) uptake                                       | (Carmella et al., 1993) (S1)                                                                                                        | (Hecht et al., 1999) (S2)                                  | (Joseph et al., 2005) (S3)                                   | (Hecht, Murphy et al., 2004) (S4)    |
| 3-Aminobiphenyl, 4 aminobiphenyl, and other aromatic amine-Hb adducts | Carcinogen (aromatic amines) uptake plus metabolic activation | (Castelao et al., 2001) (S5)                                                                                                        | (Maclure et al., 1990; Skipper & Tannenbaum, 1990) (S6,S7) | (Castelao et al., 2001; Skipper & Tannenbaum, 1990) (S5, S7) |                                      |
| 1-Hydroxypyrene in urine                                              | Carcinogen (PAH) uptake                                       | (Hecht, 2002) (S8)                                                                                                                  | (Hatsukami et al., 2004) (S9)                              |                                                              | (Hecht, Carmella et al., 2004) (S10) |
| <i>Trans, trans</i> -muconic acid in urine                            | Carcinogen (benzene) uptake                                   | (Scherer et al., 1998) (S11)                                                                                                        |                                                            |                                                              |                                      |
| <i>S</i> -phenylmercapturic acid                                      | Carcinogen (benzene) uptake                                   | (Hecht, 2002; Lin et al., 2004; Maestri et al., 2005; Melikian et al., 2002; Tharnpoophasiam et al., 2004) (S8, S12, S13, S14, S15) |                                                            |                                                              |                                      |
| Benzene and other volatile organic carcinogens (VOCs) in exhaled air  | Volatile organic carcinogens                                  | (IARC, 2004) (S16)                                                                                                                  |                                                            | (IARC, 2004) (S16)                                           |                                      |
| Ethylene oxide-Hb adducts                                             | Carcinogen (ethylene oxide) uptake                            | (Fennell et al., 2000) (S17)                                                                                                        |                                                            |                                                              |                                      |
| Other N-terminal valine adducts in Hb                                 | Carcinogen uptake                                             | (Carmella et al., 2002) (S18)                                                                                                       |                                                            |                                                              |                                      |
| Cadmium and other metals in blood and urine                           | Carcinogen uptake                                             | In part <sup>a</sup> (IARC, 2004) (S16)                                                                                             |                                                            |                                                              |                                      |
| Acetaldehyde-DNA and protein adducts                                  | Carcinogen uptake                                             |                                                                                                                                     |                                                            |                                                              |                                      |
| F <sub>2</sub> -isoprostanes and oxidized proteins                    | Oxidative damage, inflammation <sup>c</sup>                   | (J. D. Morrow et al., 1995; Pignatelli et al.,                                                                                      |                                                            |                                                              |                                      |

|                                                                  |                                                          |                                                                                                                 |                                                                                                                 |                            |                               |
|------------------------------------------------------------------|----------------------------------------------------------|-----------------------------------------------------------------------------------------------------------------|-----------------------------------------------------------------------------------------------------------------|----------------------------|-------------------------------|
|                                                                  |                                                          | 2001) (S19, S20)                                                                                                |                                                                                                                 |                            |                               |
| 8-OxoG or 8-oxo-dG in DNA or urine <sup>b</sup>                  | Oxidative damage, inflammation <sup>c</sup>              | In part (Hecht, 2002; IARC, 2004) (S8, S16)                                                                     |                                                                                                                 |                            |                               |
| Mercapturic acids of acrolein and related compounds in urine     | Toxin uptake and metabolism                              | In part (Hecht, 2002) (S8)                                                                                      |                                                                                                                 |                            |                               |
| Benzo[a]pyrene diol epoxide-DNA and Hb adducts                   | Carcinogen (BaP) uptake and metabolic activation         | In part (Boysen & Hecht, 2003) (S21)                                                                            |                                                                                                                 |                            |                               |
| NNK and NNN-DNA and Hb adducts                                   | Carcinogen (NNK/NNN) uptake and metabolic activation     | In part (IARC, 2004) (S16)                                                                                      |                                                                                                                 |                            |                               |
| Apurinic sites in DNA<br><sup>32</sup> P-postlabelling of DNA    | DNA damage<br>Carcinogen uptake and metabolic activation | (IARC, 2004; Kriek et al., 1998; Phillips, 2002) (S16, S22, S23)                                                | (IARC, 2004; Kriek et al., 1998; Phillips, 2002) (S16, S22, S23)                                                |                            |                               |
| Immunoassays for DNA damage                                      | Carcinogen (mainly PAH) uptake and metabolic activation  | (IARC, 2004; Kriek et al., 1998; Phillips, 2002) (S16, S22, S23)                                                | (IARC, 2004; Kriek et al., 1998; Phillips, 2002) (S16, S22, S23)                                                |                            |                               |
| <u>2. Cellular biomarkers</u>                                    |                                                          |                                                                                                                 |                                                                                                                 |                            |                               |
| Urine mutagenicity                                               | Mutagen uptake                                           | (IARC, 2004) (S16)                                                                                              | (IARC, 2004) (S16)                                                                                              | (IARC, 2004) (S16)         | (Benowitz et al., 1986) (S24) |
| Sister chromatid exchange in peripheral lymphocytes              | DNA damage                                               | (IARC, 2004) (S16)                                                                                              | (IARC, 2004) (S16)                                                                                              | (Barale et al., 1998)(S25) |                               |
| Chromosomal aberrations and micronuclei frequency in lymphocytes | DNA damage                                               | In part (IARC, 2004) (S16)                                                                                      |                                                                                                                 |                            |                               |
| HPRT mutant frequency in cultured lymphocytes                    | Gene mutations                                           | In part (IARC, 2004) (S16)                                                                                      |                                                                                                                 |                            |                               |
| Bronchial metaplasia and dysplasia, sputum atypia                | Preneoplastic changes                                    | In part (Khuri et al., 2001; Lam et al., 1999; Lam et al., 2002; Prindiville et al., 2003) (S26, S27, S28, S29) | In part (Khuri et al., 2001; Lam et al., 1999; Lee et al., 1994; Prindiville et al., 2003) (S26, S27, S30, S29) |                            |                               |
| Comet assay-DNA strand breaks                                    | DNA damage                                               | No consistent effect (Moller et al., 2000) (S31)                                                                |                                                                                                                 |                            |                               |
| <u>3. Proteome differences</u>                                   | Effects on proteins                                      |                                                                                                                 |                                                                                                                 |                            |                               |

Carcinoembryonic  
antigen

Inflammation<sup>c</sup>

In part (Ohwada et al.,  
1995; Stockley et al.,  
1986) (S32, S33)

---

*Note.* <sup>a</sup>"in part", some studies support change in biomarkers by smoking status. <sup>b</sup>Published values may be unreliable due to unrecognized artifact formation.

<sup>c</sup>Uncertainty exists over whether the biomarker is a measurement of inflammation.

Supplemental Table 2: TP53 Association of environmental and occupational chemicals with possibly specific p53 mutations.

| <b>Carcinogen</b>                                      | <b>Cancer tissue</b>     | <b>TP53 mutations</b>                              | <b>Reference</b>                 |
|--------------------------------------------------------|--------------------------|----------------------------------------------------|----------------------------------|
| Cigarette smoke                                        | Lung                     | G:C to T:A in codons 157,                          | (S34)                            |
| Benzo(a)pyrene and other<br>PAH- compounds             |                          | 158, 247-249 and 273<br>Higher frequency           | (S35)<br>(S36)<br>(S37)<br>(S38) |
| Cigarette smoke                                        | Colorectal               | Higher frequency                                   | (S39)                            |
| Cigarette smoke                                        | Bladder                  | Higher frequency<br>Double mutations<br>A:T to G:C | (S40)                            |
| Cigarette smoke and<br>alcohol                         | Head and neck            | Codons 205, 245, 248                               | (S41)                            |
| Cigarette smoke and<br>alcohol                         | Esophagus, head and neck | G:C to T:A                                         | (S42)                            |
| UV-radiation                                           | Skin                     | CC to TT                                           | (S43)<br>(S44)<br>(S45)<br>(S46) |
| Vinyl chloride                                         | Liver                    | A:T to T:A                                         | (S47, S48)                       |
| Mustard gas                                            | Lung                     | Double G:C to A:T                                  | (S49)                            |
| Chromate exposure<br>Nickel exposure<br>Metal industry | Lung                     | G:C to T:A on non-coding<br>strand                 | (S36)                            |
| Petrochemical Industry                                 | Lung                     | G:C to A:T at non- CpG<br>sites                    | (S36)                            |

## References:

- S1. Carmella SG, Akerkar S, Hecht SS. Metabolites of the tobacco-specific nitrosamine 4-(methylnitrosamino)-1-(3-pyridyl)-1-butanone in smokers' urine. *Cancer Res* 1993;53: 721-4.
- S2. Hecht SS. Tobacco smoke carcinogens and lung cancer. *J Natl Cancer Inst* 1999;91: 1194-210.
- S3. Joseph AM, Hecht SS, Murphy SE, *et al.* Relationships between cigarette consumption and biomarkers of tobacco toxin exposure. *Cancer Epidemiol Biomarkers Prev* 2005;14: 2963-8.
- S4. Hecht SS, Murphy SE, Carmella SG, *et al.* Effects of reduced cigarette smoking on the uptake of a tobacco-specific lung carcinogen. *J Natl Cancer Inst* 2004;96: 107-15.
- S5. Castelao JE, Yuan JM, Skipper PL, *et al.* Gender- and smoking-related bladder cancer risk. *J Natl Cancer Inst* 2001;93: 538-45.
- S6. Maclure M, Bryant MS, Skipper PL, Tannenbaum SR. Decline of the hemoglobin adduct of 4-aminobiphenyl during withdrawal from smoking. *Cancer Res* 1990;50: 181-4.
- S7. Skipper PL, Tannenbaum SR. Protein adducts in the molecular dosimetry of chemical carcinogens. *Carcinogenesis* 1990;11: 507-18.
- S8. Hecht SS. Cigarette smoking and lung cancer: chemical mechanisms and approaches to prevention. *Lancet Oncol* 2002;3: 461-9.
- S9. Hatsukami DK, Lemmonds C, Zhang Y, *et al.* Evaluation of carcinogen exposure in people who used "reduced exposure" tobacco products. *J Natl Cancer Inst* 2004;96: 844-52.
- S10. Hecht SS, Carmella SG, Le KA, *et al.* Effects of reduced cigarette smoking on levels of 1-hydroxypyrene in urine. *Cancer Epidemiol Biomarkers Prev* 2004;13: 834-42.
- S11. Scherer G, Renner T, Meger M. Analysis and evaluation of trans,trans-muconic acid as a biomarker for benzene exposure. *J Chromatogr B Biomed Sci Appl* 1998;717: 179-99.
- S12. Lin LC, Tyan YC, Shih TS, Chang YC, Liao PC. Development and validation of an isotope-dilution electrospray ionization tandem mass spectrometry method with an on-line sample clean-up device for the quantitative analysis of the benzene exposure biomarker S-phenylmercapturic acid in human urine. *Rapid Commun Mass Spectrom* 2004;18: 1310-6.
- S13. Maestri L, Negri S, Ferrari M, Ghittori S, Imbriani M. Determination of urinary S-phenylmercapturic acid, a specific metabolite of benzene, by liquid chromatography/single quadrupole mass spectrometry. *Rapid Commun Mass Spectrom* 2005;19: 1139-44.
- S14. Melikian AA, Qu Q, Shore R, *et al.* Personal exposure to different levels of benzene and its relationships to the urinary metabolites S-phenylmercapturic acid and trans,trans-muconic acid. *J Chromatogr B Analyt Technol Biomed Life Sci* 2002;778: 211-21.
- S15. Tharnpoophasiam P, Kongtip P, Wongwit W, Fungladda W, Kitayaporn D. Simultaneous determination of trans, transmuconic acid and s-phenylmercapturic acid by high pressure liquid chromatography and its application. *Southeast Asian J Trop Med Public Health* 2004;35: 717-23.
- S16. IARC. Tobacco smoke and involuntary smoking. IARC Monograph 83. France: International Agency for Research on Cancer; 2004.
- S17. Fennell TR, MacNeela JP, Morris RW, Watson M, Thompson CL, Bell DA. Hemoglobin adducts from acrylonitrile and ethylene oxide in cigarette smokers: effects of glutathione S-transferase T1-null and M1-null genotypes. *Cancer Epidemiol Biomarkers Prev* 2000;9: 705-12.
- S18. Carmella SG, Chen M, Villalta PW, Gurney JG, Hatsukami DK, Hecht SS. Ethylation and methylation of hemoglobin in smokers and non-smokers. *Carcinogenesis* 2002;23: 1903-10.
- S19. Morrow JD, Frei B, Longmire AW, *et al.* Increase in circulating products of lipid peroxidation (F2-isoprostanes) in smokers. Smoking as a cause of oxidative damage. *N Engl J Med* 1995;332: 1198-203.
- S20. Pignatelli B, Li CQ, Boffetta P, *et al.* Nitrated and oxidized plasma proteins in smokers and lung cancer patients. *Cancer Res* 2001;61: 778-84.

- S21. Boysen G, Hecht SS. Analysis of DNA and protein adducts of benzo[a]pyrene in human tissues using structure-specific methods. *Mutat Res* 2003;543: 17-30.
- S22. Kriek E, Rojas M, Alexandrov K, Bartsch H. Polycyclic aromatic hydrocarbon-DNA adducts in humans: relevance as biomarkers for exposure and cancer risk. *Mutat Res* 1998;400: 215-31.
- S23. Phillips DH. Smoking-related DNA and protein adducts in human tissues. *Carcinogenesis* 2002;23: 1979-2004.
- S24. Benowitz NL, Jacob P, 3rd, Kozlowski LT, Yu L. Influence of smoking fewer cigarettes on exposure to tar, nicotine, and carbon monoxide. *N Engl J Med* 1986;315: 1310-3.
- S25. Barale R, Chelotti L, Davini T, *et al.* Sister chromatid exchange and micronucleus frequency in human lymphocytes of 1,650 subjects in an Italian population: II. Contribution of sex, age, and lifestyle. *Environ Mol Mutagen* 1998;31: 228-42.
- S26. Khuri FR, Lee JS, Lippman SM, *et al.* Modulation of proliferating cell nuclear antigen in the bronchial epithelium of smokers. *Cancer Epidemiol Biomarkers Prev* 2001;10: 311-8.
- S27. Lam S, leRiche JC, Zheng Y, *et al.* Sex-related differences in bronchial epithelial changes associated with tobacco smoking. *J Natl Cancer Inst* 1999;91: 691-6.
- S28. Lam S, MacAulay C, Le Riche JC, *et al.* A randomized phase IIb trial of anethole dithiolethione in smokers with bronchial dysplasia. *J Natl Cancer Inst* 2002;94: 1001-9.
- S29. Prindiville SA, Byers T, Hirsch FR, *et al.* Sputum cytological atypia as a predictor of incident lung cancer in a cohort of heavy smokers with airflow obstruction. *Cancer Epidemiol Biomarkers Prev* 2003;12: 987-93.
- S30. Lee JS, Lippman SM, Benner SE, *et al.* Randomized placebo-controlled trial of isotretinoin in chemoprevention of bronchial squamous metaplasia. *J Clin Oncol* 1994;12: 937-45.
- S31. Moller P, Knudsen LE, Loft S, Wallin H. The comet assay as a rapid test in biomonitoring occupational exposure to DNA-damaging agents and effect of confounding factors. *Cancer Epidemiol Biomarkers Prev* 2000;9: 1005-15.
- S32. Ohwada A, Takahashi H, Nagaoka I, Iwabuchi K, Mikami O, Kira S. Effect of cigarette smoke on the mRNA and protein expression of carcinoembryonic antigen (CEA), a possible chemoattractant for neutrophils in human bronchioloalveolar tissues. *Thorax* 1995;50: 651-7.
- S33. Stockley RA, Shaw J, Whitfield AG, Whitehead TP, Clarke CA, Burnett D. Effect of cigarette smoking, pulmonary inflammation, and lung disease on concentrations of carcinoembryonic antigen in serum and secretions. *Thorax* 1986;41: 17-24.
- S34. Takahashi T, Nau MM, Chiba I, *et al.* p53: a frequent target for genetic abnormalities in lung cancer. *Science* 1989;246: 491-4.
- S35. Chiba I, Takahashi T, Nau MM, *et al.* Mutations in the p53 gene are frequent in primary, resected non-small cell lung cancer. Lung Cancer Study Group. *Oncogene* 1990;5: 1603-10.
- S36. Harty LC, Guinee DG, Jr., Travis WD, *et al.* p53 mutations and occupational exposures in a surgical series of lung cancers. *Cancer Epidemiol Biomarkers Prev* 1996;5: 997-1003.
- S37. Hainaut P, Pfeifer GP. Patterns of p53 G-->T transversions in lung cancers reflect the primary mutagenic signature of DNA-damage by tobacco smoke. *Carcinogenesis* 2001;22: 367-74.
- S38. Vahakangas KH, Bennett WP, Castren K, *et al.* p53 and K-ras mutations in lung cancers from former and never-smoking women. *Cancer Res* 2001;61: 4350-6.
- S39. Miyaki M, Iijima T, Ishii R, *et al.* Increased frequency of p53 mutation in sporadic colorectal cancer from cigarette smokers. *Jpn J Clin Oncol* 2002;32: 196-201.
- S40. Wallerand H, Bakkar AA, de Medina SG, *et al.* Mutations in TP53, but not FGFR3, in urothelial cell carcinoma of the bladder are influenced by smoking: contribution of exogenous versus endogenous carcinogens. *Carcinogenesis* 2005;26: 177-84.
- S41. Somers KD, Merrick MA, Lopez ME, Incognito LS, Schechter GL, Casey G. Frequent p53 mutations in head and neck cancer. *Cancer Res* 1992;52: 5997-6000.

- S42. Brennan JA, Boyle JO, Koch WM, *et al.* Association between cigarette smoking and mutation of the p53 gene in squamous-cell carcinoma of the head and neck. *N Engl J Med* 1995;332: 712-7.
- S43. Brash DE, Rudolph JA, Simon JA, *et al.* A role for sunlight in skin cancer: UV-induced p53 mutations in squamous cell carcinoma. *Proc Natl Acad Sci U S A* 1991;88: 10124-8.
- S44. Dumaz N, Stary A, Soussi T, Daya-Grosjean L, Sarasin A. Can we predict solar ultraviolet radiation as the causal event in human tumours by analysing the mutation spectra of the p53 gene? *Mutat Res* 1994;307: 375-86.
- S45. Nakazawa H, English D, Randell PL, *et al.* UV and skin cancer: specific p53 gene mutation in normal skin as a biologically relevant exposure measurement. *Proc Natl Acad Sci U S A* 1994;91: 360-4.
- S46. Daya-Grosjean L, Dumaz N, Sarasin A. The specificity of p53 mutation spectra in sunlight induced human cancers. *J Photochem Photobiol B* 1995;28: 115-24.
- S47. Hollstein M, Marion MJ, Lehman T, *et al.* p53 mutations at A:T base pairs in angiosarcomas of vinyl chloride-exposed factory workers. *Carcinogenesis* 1994;15: 1-3.
- S48. Marion MJ. Critical genes as early warning signs: example of vinyl chloride. *Toxicol Lett* 1998;102-103: 603-7.
- S49. Takeshima Y, Inai K, Bennett WP, *et al.* p53 mutations in lung cancers from Japanese mustard gas workers. *Carcinogenesis* 1994;15: 2075-9.
